# Supplementary material for: Banana-shaped molecular architecture: Formation of large columns composed of two concentrically enclosed layers
Source: Royal Society of Chemistry journal article supplement (doi:10.1039/c2jm34051h), 2012-01-01
Supplement: c2jm34051h.pdf [file c2jm34051h.pdf]

Supporting information

## **Banana-Shaped Molecular Architecture: Formation of Large Columns Composed of Two Concentrically Enclosed Layers**

**Sungmin Kang,<sup>\*a</sup> Ryohei Ishige,<sup>b</sup> Eun-Woo Lee,<sup>a</sup> Masatoshi Tokita<sup>a</sup> and Junji Watanabe<sup>a</sup>**

<sup>a</sup> Department of Organic and Polymeric Materials, Tokyo Institute of Technology, 2-12-1 Ookayama, Meguro-ku, Tokyo 152-8552, Japan

<sup>b</sup> Institute for Materials Chemistry and Engineering, Kyushu University, 744 Motooka, Nishi-ku, Fukuoka 819-0395, Japan

Figure Caption

Figure S1. Phase behavior of 4Br-P-*n*-O-PIMB compounds. The transition temperatures and phase structures are shown as a function of the carbon number (*n*) in the alkoxy tail.

Figure S2. (a–h) Fourier reconstitution of the electron density maps for the X3 phase using the four reflections *210*, *220*, *310*, and *400* with different phase combinations.

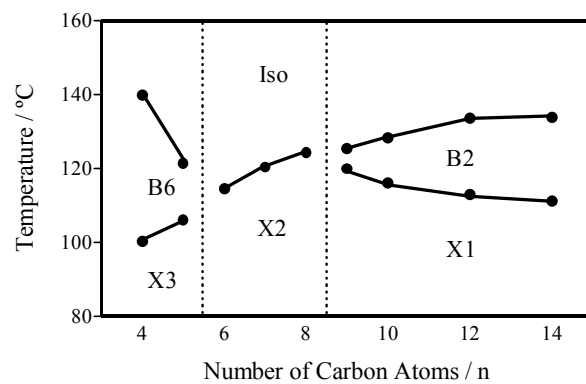

Figure S1

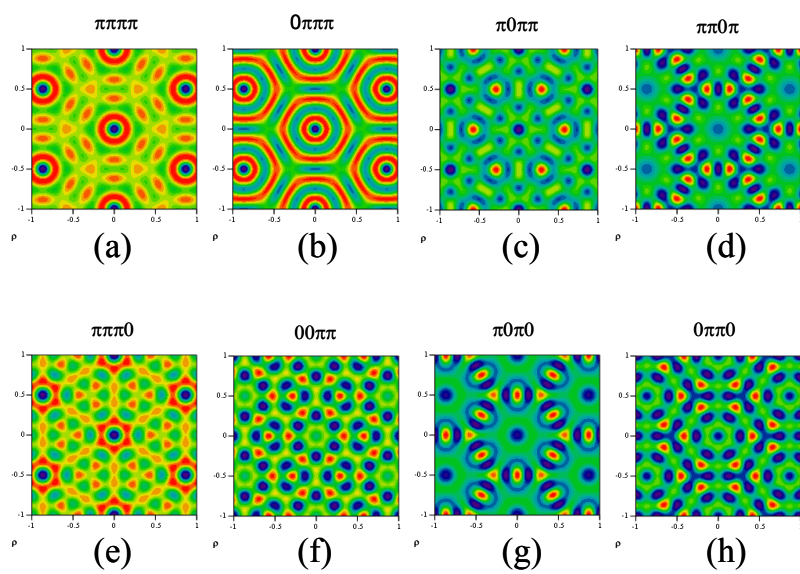

Figure S2
